# Supplementary material for: Cytokines as Biomarkers of Treatment Response to IFNβin Relapsing-Remitting Multiple Sclerosis
Source: Hindawi journal article supplement (doi:10.1155/2014/436764), 2014-01-01
Supplement: f1 [file 436764.f1.pdf]

**Supplementary Tables S1 and S2.** Serum and CSF cytokine levels of MS patients separated by treatment response group

| Cytokine in serum              | GR                  | PR                  | p           | noRx                | p (vs GR, PR)     |
|--------------------------------|---------------------|---------------------|-------------|---------------------|-------------------|
| <b>IFN-<math>\gamma</math></b> | 6.12 $\pm$ 4.90     | 4.73 $\pm$ 4.59     | 0.44        | 1.22 $\pm$ 1.72     | <b>0.03, 0.05</b> |
| <b>IL-6</b>                    | 7.09 $\pm$ 3.71     | 5.28 $\pm$ 4.29     | 0.23        | 5.89 $\pm$ 1.35     | 0.38, 0.70        |
| <b>IL-17A</b>                  | 17.32 $\pm$ 12.33   | 6.67 $\pm$ 8.37     | <b>0.03</b> | 8.19 $\pm$ 9.64     | <b>0.05, 0.81</b> |
| <b>IL-2</b>                    | 4.34 $\pm$ 2.04     | 4.65 $\pm$ 3.53     | 0.77        | 2.50 $\pm$ 2.04     | <b>0.05, 0.13</b> |
| <b>IL-4</b>                    | 3.33 $\pm$ 3.29     | 4.04 $\pm$ 2.77     | 0.57        | 2.98 $\pm$ 2.15     | 0.95, 0.37        |
| <b>IL-10</b>                   | 4.81 $\pm$ 4.98     | 5.75 $\pm$ 8.63     | 0.54        | 6.20 $\pm$ 12.45    | 0.30, 0.66        |
| <b>TNF-<math>\alpha</math></b> | 5.63 $\pm$ 4.59     | 3.48 $\pm$ 4.13     | 0.32        | 1.26 $\pm$ 2.44     | <b>0.05, 0.29</b> |
| <b>TGF-<math>\beta</math>1</b> | 40,094 $\pm$ 12,414 | 38,496 $\pm$ 10,017 | 0.77        | 35,858 $\pm$ 12,660 | 0.42, 0.67        |

| Cytokine in CSF                | GR                | PR                | p    | noRx              | p (vs GR, PR) |
|--------------------------------|-------------------|-------------------|------|-------------------|---------------|
| <b>IFN-<math>\gamma</math></b> | 3.56 $\pm$ 5.52   | 4.80 $\pm$ 7.19   | 0.90 | 4.57 $\pm$ 5.48   | 0.32, 0.30    |
| <b>IL-6</b>                    | 5.56 $\pm$ 6.64   | 5.99 $\pm$ 4.22   | 0.46 | 6.47 $\pm$ 4.10   | 0.30, 0.80    |
| <b>IL-17A</b>                  | 8.33 $\pm$ 12.20  | 14.48 $\pm$ 18.42 | 0.48 | 17.02 $\pm$ 16.38 | 0.17, 0.63    |
| <b>IL-2</b>                    | 1.13 $\pm$ 1.91   | 2.49 $\pm$ 3.34   | 0.30 | 2.30 $\pm$ 1.72   | 0.06, 0.66    |
| <b>IL-4</b>                    | 2.24 $\pm$ 2.67   | 2.30 $\pm$ 2.01   | 0.63 | 2.81 $\pm$ 2.82   | 0.71, 0.64    |
| <b>IL-10</b>                   | 2.30 $\pm$ 4.17   | 4.49 $\pm$ 6.61   | 0.67 | 2.92 $\pm$ 1.66   | 0.06, 0.58    |
| <b>TNF-<math>\alpha</math></b> | 2.62 $\pm$ 3.53   | 2.39 $\pm$ 3.53   | 0.83 | 5.25 $\pm$ 4.95   | 0.19, 0.28    |
| <b>TGF-<math>\beta</math>1</b> | 79.37 $\pm$ 20.18 | 67.29 $\pm$ 48.87 | 0.25 | 67.43 $\pm$ 31.44 | 0.47, 0.79    |

Data are given as mean  $\pm$  SD; cytokines were measured in pg/ml; numbers in bold denote statistical significance.

**Supplementary Tables S3 and S4.** Serum and CSF cytokine ratios in MS patients separated by treatment response group

| <b>Serum<br/>cytokine<br/>ratios</b> | <b>GR</b>   | <b>PR</b>   | <b>p</b>    | <b>noRx</b> | <b>p (vs GR, PR)</b> |
|--------------------------------------|-------------|-------------|-------------|-------------|----------------------|
| <b>Th1/Th2</b>                       | 2.53± 1.35  | 1.89 ± 1.22 | 0.26        | 1.45 ± 0.90 | <b>0.05</b> , 0.68   |
| <b>Th1/Th17</b>                      | 0.71 ± 0.29 | 1.24 ± 0.86 | <b>0.05</b> | 0.89 ± 0.87 | 0.88, 0.24           |
| <b>Type 1<sup>a</sup>/Type 2</b>     | 3.05 ± 1.27 | 2.02 ± 1.64 | 0.07        | 1.63 ± 0.84 | <b>0.01</b> , 0.54   |
| <b>Type 1<sup>b</sup>/Type 2</b>     | 2.69 ± 1.19 | 1.54 ± 1.63 | 0.07        | 1.39 ± 0.93 | <b>0.03</b> , 0.53   |
| <b>IFN-γ/IL-10</b>                   | 1.55 ± 0.65 | 1.03 ± 0.73 | <b>0.02</b> | 0.68 ± 0.45 | <b>0.01</b> , 0.36   |
| <b>IL-17A/IL-10</b>                  | 4.14 ± 1.95 | 1.94 ± 1.52 | <b>0.01</b> | 2.40 ± 1.64 | <b>0.05</b> , 0.55   |
| <b>Th17/Th2</b>                      | 3.78 ± 2.21 | 1.77 ± 1.49 | <b>0.03</b> | 2.62 ± 2.19 | 0.36, 0.41           |
|                                      |             |             |             |             |                      |
| <b>CSF<br/>cytokine<br/>ratios</b>   | <b>GR</b>   | <b>PR</b>   | <b>p</b>    | <b>noRx</b> | <b>p (vs GR, PR)</b> |
| <b>Th1/Th2</b>                       | 2.37 ± 1.58 | 2.36 ± 1.43 | 0.92        | 2.55 ± 0.66 | 0.23, 0.75           |
| <b>Th1/Th17</b>                      | 0.81 ± 0.40 | 0.65 ± 0.49 | 0.33        | 1.36 ± 1.46 | 0.88, 0.28           |
| <b>Type 1<sup>a</sup>/Type 2</b>     | 2.93 ± 1.51 | 2.67 ± 1.66 | 0.67        | 3.82 ± 1.56 | 0.20, 0.14           |
| <b>Type 1<sup>b</sup>/Type 2</b>     | 2.55 ± 1.35 | 3.55 ± 3.90 | 0.91        | 3.63 ± 1.42 | 0.21, 0.36           |
| <b>IFN-γ/IL-10</b>                   | 1.75 ± 1.39 | 1.30 ± 1.22 | 0.27        | 1.42 ± 1.10 | 0.58, 0.86           |
| <b>IL-17A/IL-10</b>                  | 4.06 ± 2.67 | 2.98 ± 2.31 | 0.29        | 4.77 ± 3.03 | 0.47, 0.18           |
| <b>Th17/Th2</b>                      | 2.25 ± 2.00 | 4.21 ± 3.69 | 0.16        | 3.59 ± 2.23 | 0.10, 0.96           |

Data are given as mean ± SD; <sup>a</sup>IL-2 values included; <sup>b</sup>IL-2 values omitted; numbers in bold denote statistical significance.
